# Supplementary material for: Superconducting H7 chain in gallium hydrides at high pressure
Source: Royal Society of Chemistry journal article supplement (doi:10.1039/d2cp05690a), 2023-01-01
Supplement: d2cp05690a1.pdf [file d2cp05690a1.pdf]

## Supporting Information

### Superconducting H<sub>7</sub> chain in gallium hydrides at high pressure

Meixu Liu,<sup>1</sup> Wenwen Cui,<sup>1,\*</sup> Jingming Shi,<sup>1</sup> Jian Hao and Yinwei Li<sup>1,†</sup>

<sup>1</sup> *Laboratory of Quantum Functional Materials Design and Application, School of Physics and Electronic Engineering, Jiangsu Normal University, Xuzhou 221116, China*

Corresponding to: wenwencui@jsnu.edu.cn & yinwei\_li@jsnu.edu.cn

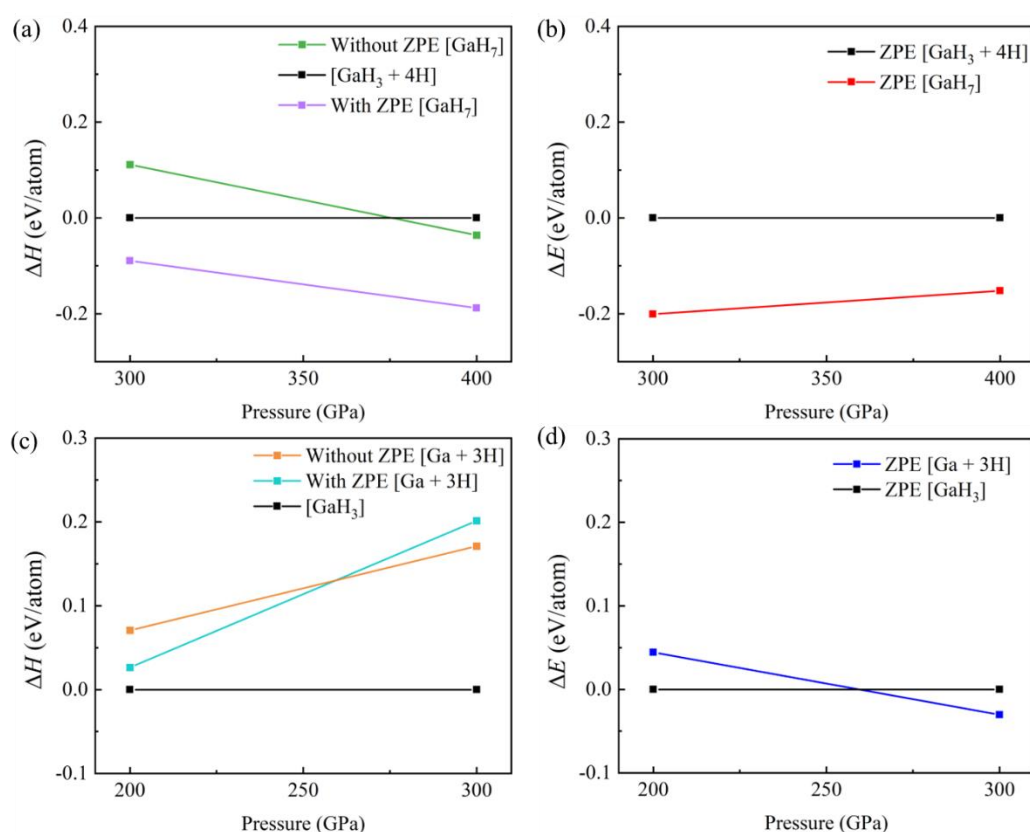

FIG. S1. Relative enthalpies of GaH<sub>7</sub> (a) and GaH<sub>3</sub> (c) with and without inclusion of ZPE as a function of pressure. (b) and (d) are the relative ZPE of GaH<sub>7</sub> and GaH<sub>3</sub> as a function of pressure, respectively.

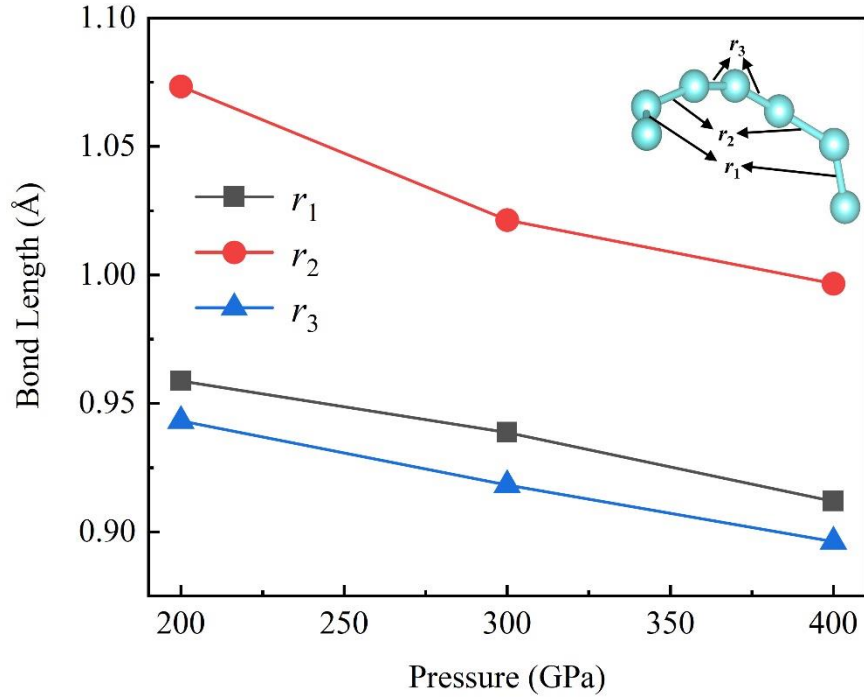

FIG. S2 bond length of Ga-H system at different pressures.

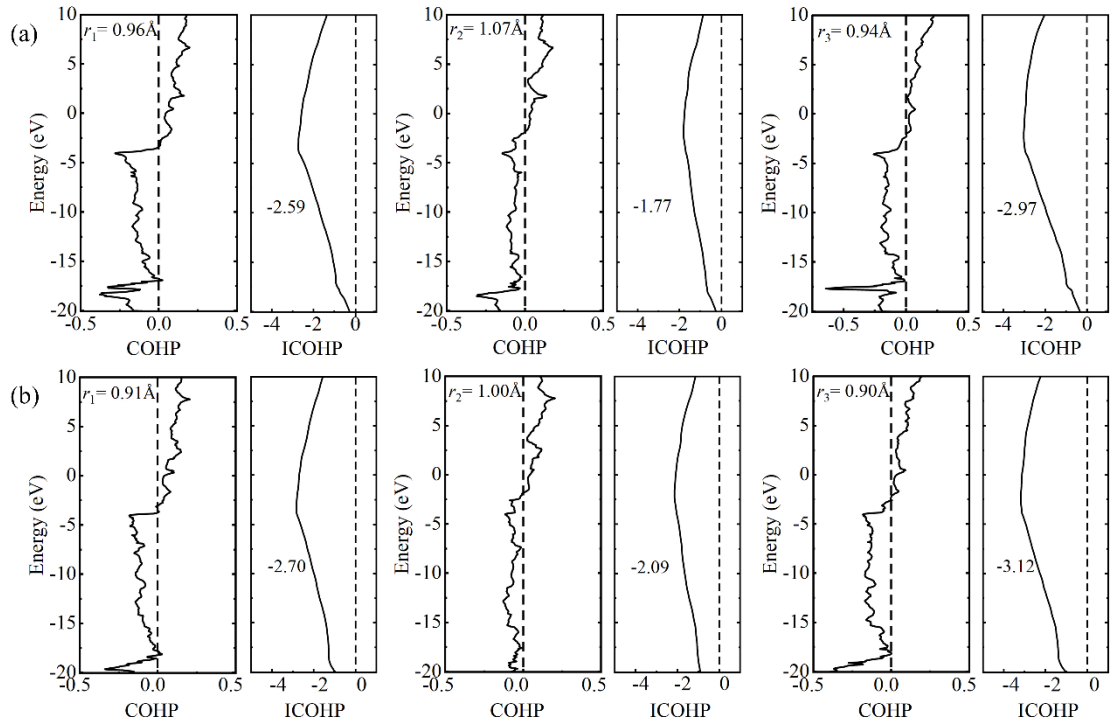

FIG. S3 The calculated crystalline orbital Hamiltonian population (COHP) and integrated crystalline orbital Hamiltonian population (ICOHP) of GaH<sub>7</sub> for three different H-H distances in H<sub>7</sub> chain at 200 GPa (a) and 400 GPa (b).

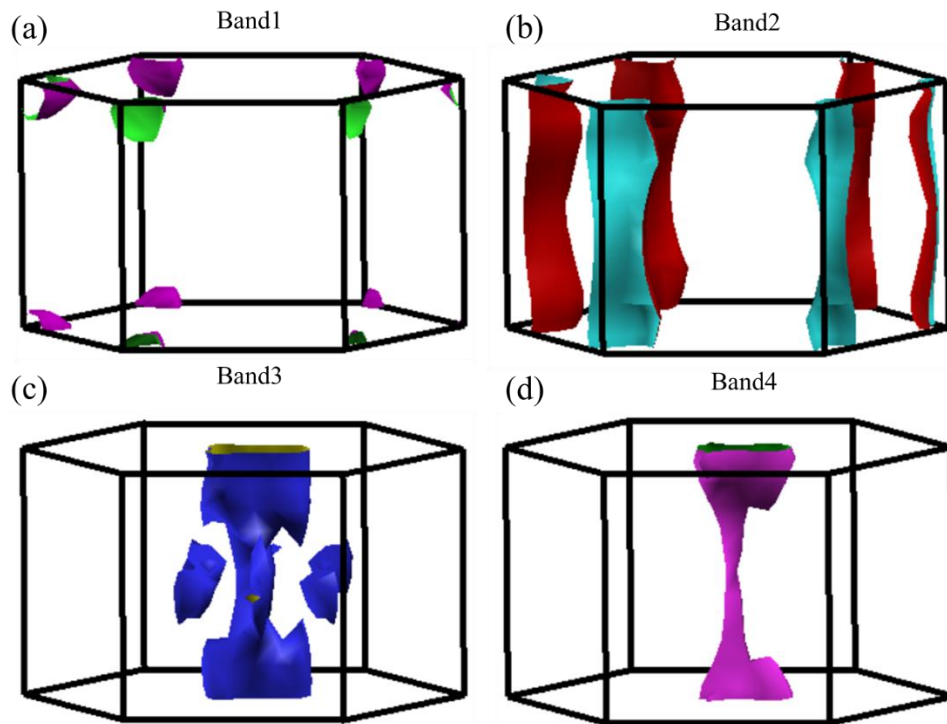

FIG. S4 The Fermi surfaces of GaH<sub>7</sub> associated with the four bands that contribute significantly to the electronic band structure at 300 GPa.

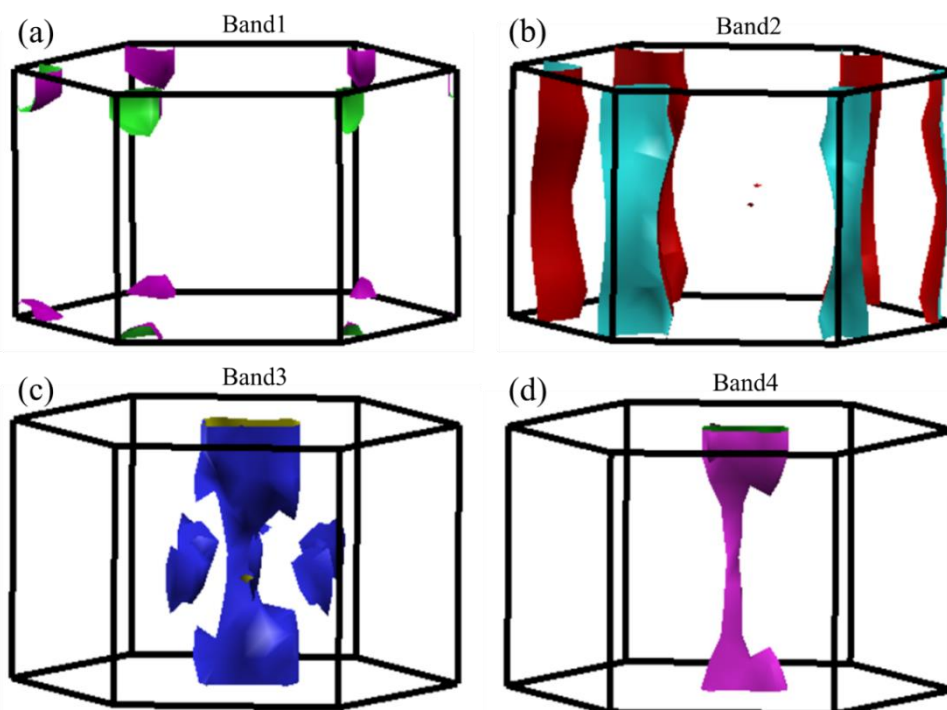

FIG. S5 The Fermi surfaces of GaH<sub>7</sub> associated with the four bands that contribute significantly to the electronic band structure at 200 GPa.

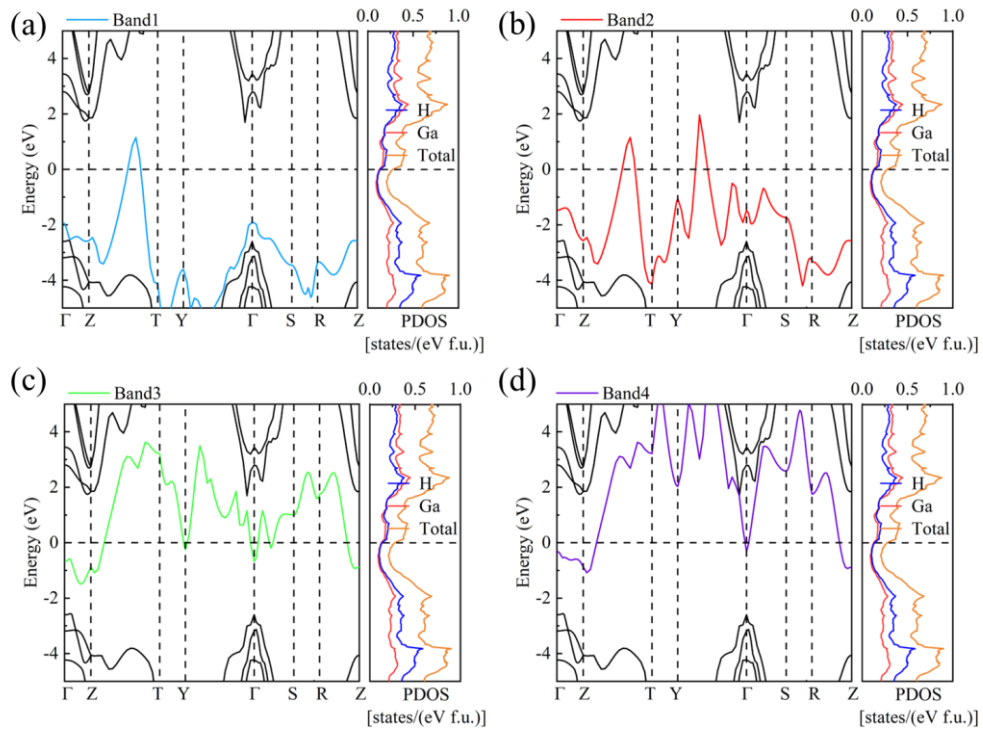

FIG. S6. The band structure and the density of states (DOS) of GaH<sub>7</sub> at 300GPa.

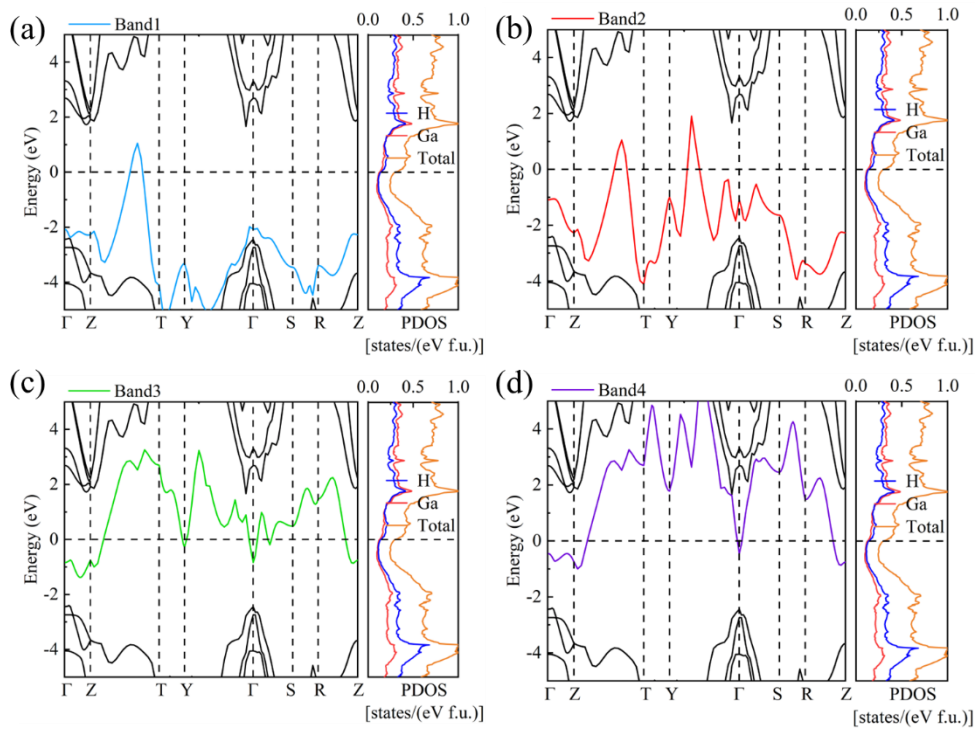

FIG. S7. The band structure and the density of states (DOS) of GaH<sub>7</sub> at 200GPa.

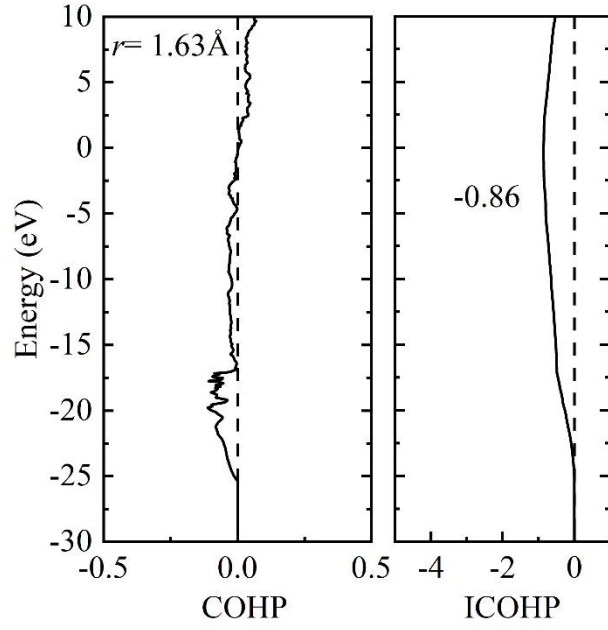

FIG. S8 The calculated crystalline orbital Hamiltonian population (COHP) and integrated crystalline orbital Hamiltonian population (ICOHP) of GaH<sub>7</sub> for the shortest Ga-H distances in GaH<sub>7</sub> at 300 GPa

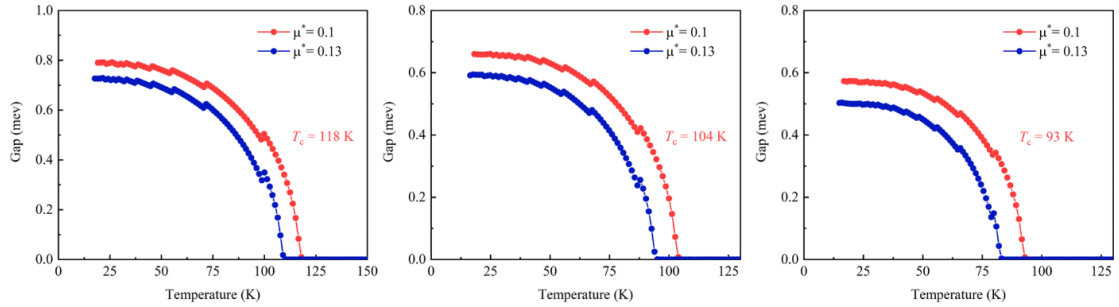

FIG. S9. Calculated anisotropic superconducting gap of GaH<sub>7</sub> at 200 GPa, 300 GPa and 400 GPa.

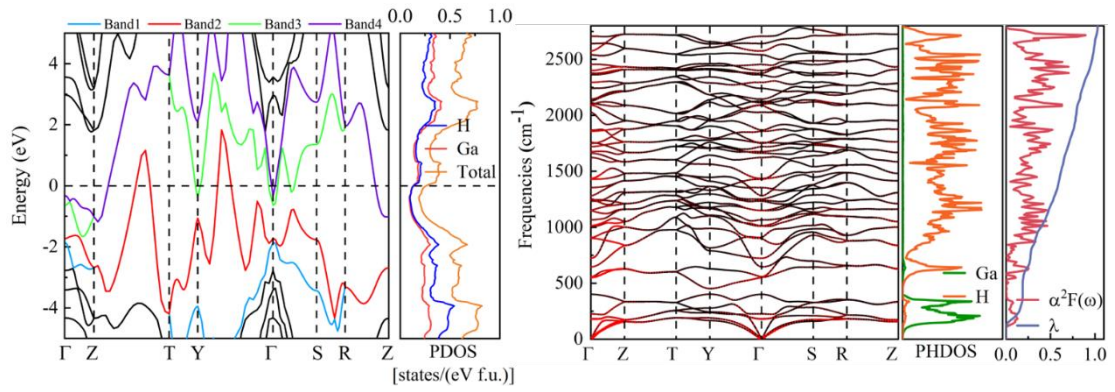

FIG. S10. Electronic band structure and projected density of states (PDOS), phonon-dispersion curves, PHDOS, Eliashberg spectral function  $\alpha^2F(\omega)$  and the EPC parameter  $\lambda$  of GaH<sub>7</sub> at 400 GPa.

Table. S1. Charge transfer of Ga and H of  $C222_1$  GaH<sub>7</sub> in one unit cell at different pressures. The negative and positive sign indicate electron gain and loss, respectively.

| Pressure (GPa) | Atoms | Charge (e) |
|----------------|-------|------------|
| 200            | H1    | -0.22      |
|                | H2    | -0.15      |
|                | H3    | -0.10      |
|                | H4    | -0.12      |
|                | Ga    | +1.06      |
| 300            | H1    | -0.24      |
|                | H2    | -0.15      |
|                | H3    | -0.10      |
|                | H4    | -0.13      |
|                | Ga    | +1.12      |
| 400            | H1    | -0.25      |
|                | H2    | -0.15      |
|                | H3    | -0.11      |
|                | H4    | -0.13      |
|                | Ga    | +1.16      |

Table. S2. Structural information of GaH<sub>7</sub>.

| Space group           | Lattice parameter (Å, °)                                          | atomic coordinate | x      | y     | z     | sites |
|-----------------------|-------------------------------------------------------------------|-------------------|--------|-------|-------|-------|
| $C222_1$<br>(300 GPa) | $a=5.460$<br>$b= 3.142$<br>$c= 4.193$<br>$\alpha=\beta=\gamma=90$ | H1                | -0.077 | 0.699 | 1.123 | 8c    |
|                       |                                                                   | H2                | -0.209 | 0.524 | 1.180 | 8c    |
|                       |                                                                   | H3                | -0.212 | 0.771 | 1.435 | 8c    |
|                       |                                                                   | H4                | 0.174  | 0.500 | 1.000 | 4a    |
|                       |                                                                   | Ga                | 0.000  | 0.835 | 0.750 | 4b    |

Table. S3. The calculated electron-phonon coupling parameter ( $\lambda$ ), logarithmic average phonon frequency ( $\omega_{\log}$ ), and the estimated  $T_c$  for GaH<sub>7</sub> using the Allen-Dynes modified McMillan (ADM) equation, and numerically solving the Eliashberg equations with  $\mu^* = 0.1$ .

| Pressure (GPa) | $\lambda$ | $\omega_{\log}$ (K) | $T_c$ (K) |            |
|----------------|-----------|---------------------|-----------|------------|
|                |           |                     | ADM       | Eliashberg |
| 200            | 1.35      | 902                 | 93        | 118        |
| 300            | 1.01      | 1291                | 91        | 104        |
| 400            | 0.89      | 1431                | 82        | 93         |
